# Supplementary material
Source: publisher site journal article supplement (https://www.dovepress.com/article/432885)
Supplement: Supplementary file 1 [file get_supplementary_file.php]

### **Appendix S1. The complete list of ICONS members and sites.**

Beijing Tiantan Hospital Capital Medical University, Beijing, China: Yongjun Wang, MD; The Second People's Hospital of Jinzhong, Jinzhong, China: Fanping He, MD; Jiyuan People's Hospital, Jiyuan, China: Ting Wang, MD; Penglai People's Hospital, Penglai, China: Guiru Zhang, MD; Xi'an First Hospital, Xi'an, China: Songdi Wu, MD; Qinghai Provincial People's Hospital, Qinghai, China: Shizheng Wu, MD; Cangzhou Central Hospital, Cangzhou, China: Junling Zhang, MD; Penglai Traditional Chinese Medicine Hospital, Penglai, China: Mingzong Yan, MD; Tianjin Huanhu Hospital, Tianjin, China: Zhongping An, MD; First People's Hospital of Shenyang, Shenyang, China: Jin Zhou, MD; Weixian People's Hospital, Xingtai, China: Cunrui Wang, MD; The NO.2 Hospital of Baoding, Baoding, China: Fengli Zhao, MD; Beijing Haidian Hospital, Beijing, China: Fengchun Yu, MD; Changge Municipal People's Hospital, Xuchang, China: Gexia Liu, MD; The Third Hospital of Hebei Medical University, Shijiazhuang, China: Junyan Liu, MD; Chenzhou First People's Hospital, Chenzhou, China: Haipeng Li, MD; Kaifeng Central Hospital, Kaifeng, China: Xincheng Han, MD; Shaoxing Central Hospital, Shaoxing, China: Jun Zhou, MD; The Second Chinese Medicine Hospital of Jiangsu, Nanjing, China: Lei Sheng, MD; Ruzhou First People's Hospital, Ruzhou, China: Chun Wang, MD; Wuyuan County People's Hospital, Bayannaer, China: Yongming Chen, MD; The Second Affiliated Hospital of Chongqing Medical University, Chongqing, China: Yangmei Chen, MD; Hengshui People's Hospital, Hengshui, China: Xinxia He, MD; The Second Affiliated Hospital of Shandong University of Traditional Chinese Medicine, Jinan, China: Xingchen Wang, MD; Huainan Chaoyang Hospital, Huainan, China: Wenguang Bu, MD; Handan City First Hospital, Handan, China: Jie Lin, MD; Xingtai Third Hospital, Xingtai, China: Yuqing Wei, MD; The Central Hospital of Enshi Autonomous Prefecture, Wuhan, China: Qunhui Liu, MD; Yiwu Hospital affiliated to Wenzhou Medical University, Yiwu, China: Yi Wu, MD; Chifeng Municipal Hospital, Chifeng, China: Li Liu, MD; Kunming Yan'an Hospital, Kunming, China: Liping Zhan, MD; The First Affiliated Hospital of Zhejiang University, Hangzhou, China: Benyan Luo, MD; Dalian Friendship Hospital, Dalian, China: Xiaohong Li, MD, Wenxu Zheng, MD; Huashan Hospital affiliated to Fudan University, Shanghai, China: Qiang Dong, MD; The Second Affiliated Hospital of Xuzhou Medical College, Xuzhou, China: Liangqun Rong, MD; Lishui Center Hospital, Lishui, China: Xueli Cai, MD; The Third People's Hospital of Ningxia, Yinchuan, China: Yongxia Wen, MD; Civil Aviation General Hospital, Beijing, China: Chenlong Wang, MD; Beijing Shijitan Hospital Capital Medical University, Beijing, China: Maolin He, MD;
